# Supplementary material for: Synthesis of highly surface-textured ZnO thin films by aerosol assisted chemical vapour deposition
Source: Royal Society of Chemistry journal article supplement (doi:10.1039/c5ta00446b), 2015-01-01
Supplement: c5ta00446b1.pdf [file c5ta00446b1.pdf]

## Synthesis of Highly Surface-Textured ZnO Thin Films by Aerosol Assisted Chemical Vapour Deposition

Shuqun Chen, Rory M. Wilson and Russell Binions\*

*School of Engineering and Materials Science, Queen Mary University of London, Mile End Road,  
London, E1 4NS, UK. E-mail: r.binions@qmul.ac.uk*

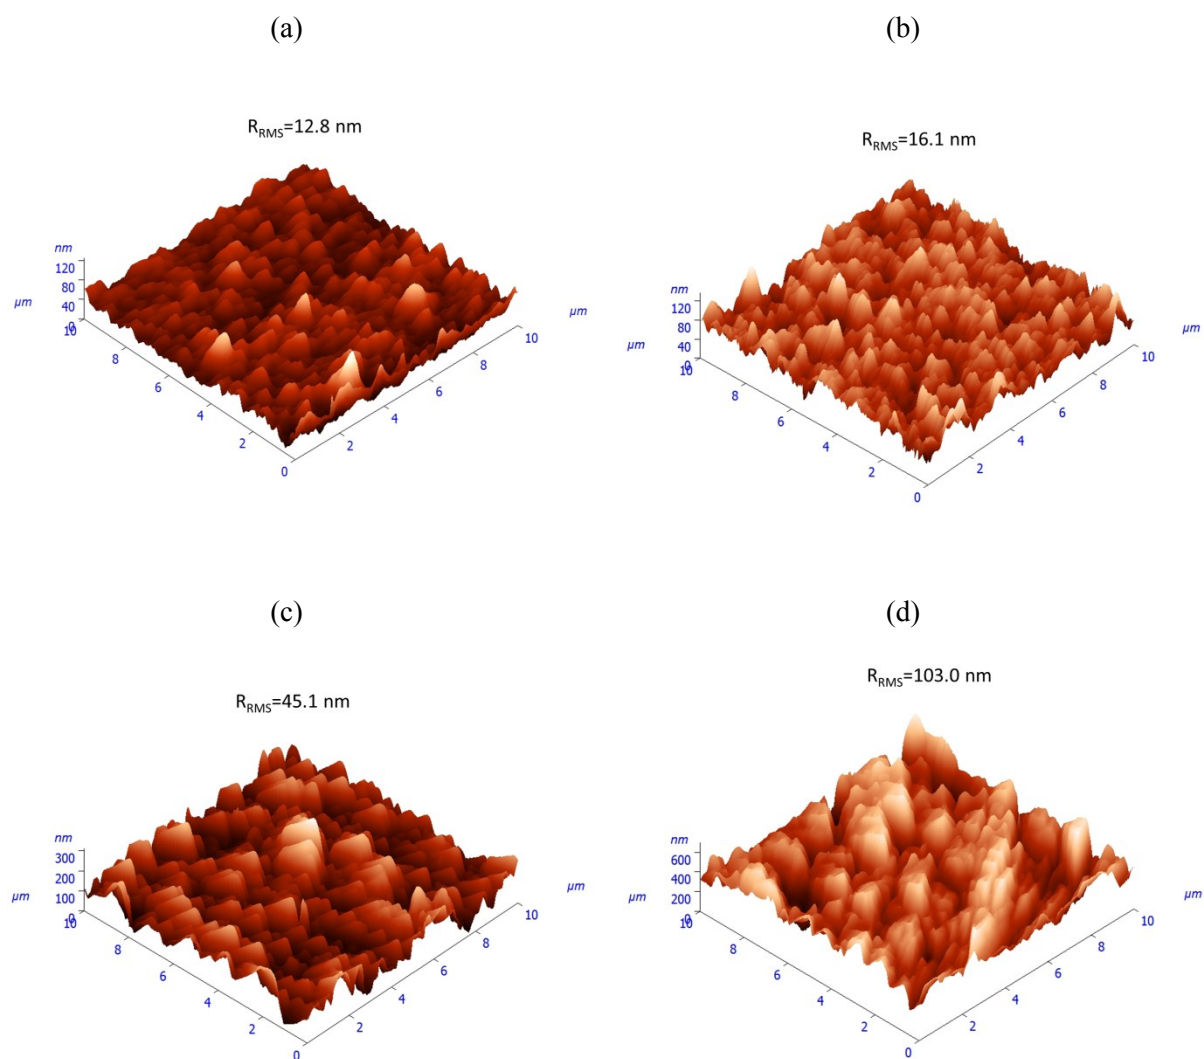

Figure S1 AFM images of ZnO films with (a) 0 mL, (b) 2 mL, (c) 4 mL and (d) 8 mL acetic-acid added in precursor solutions.

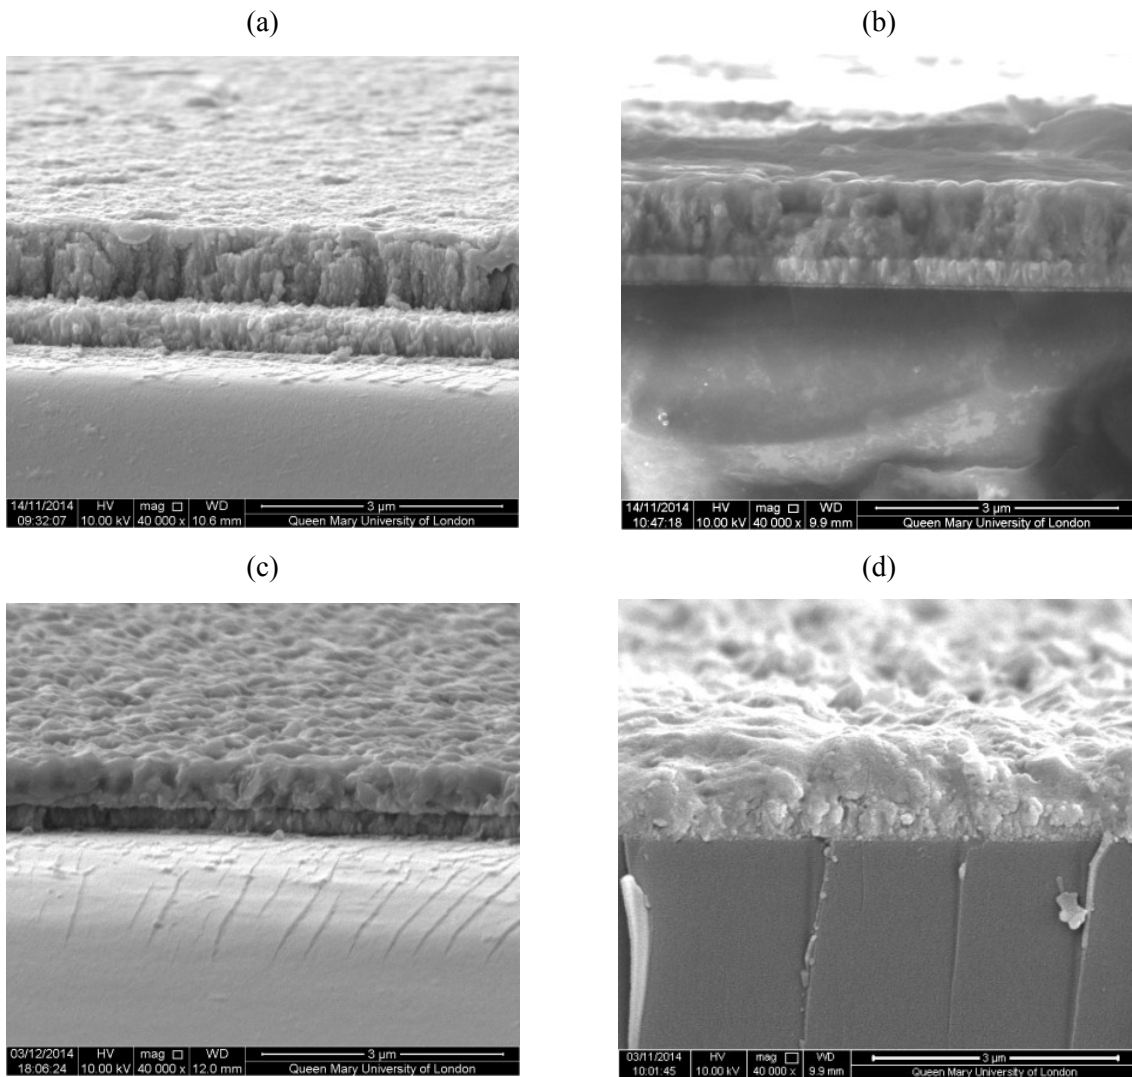

Figure S2 Cross-section SEM images of ZnO films with (a) 0 mL, (b) 2 mL, (c) 4 mL and (d) 8 mL acetic-acid added in precursor solutions.
